# Supplementary material
Source: PubMed Central journal article supplement (PMC165405)
Supplement: plntcell_15_7_1619__1.pdf [file plntcell_15_7_1619__1.pdf]

Appendix table 1

| Protein                         | Yeast | Human | Arabidopsis | Title                            | TargetP         | MitoProt | Predotar       | Rice chr | Bac           |
|---------------------------------|-------|-------|-------------|----------------------------------|-----------------|----------|----------------|----------|---------------|
| Uracil DNA glycosylase          |       | UNG1  | At3g18630   | uracil-DNA glycosylase, putative | cp0.928         | 0.3255   | mt0.933        | chr4     | OSJNBb0004A17 |
| 8-oxoguanine DNA glycosylase    | OGG1  | OGG1  | At1g21710   | 8-oxoguanine-DNA glycosylase     | cp0.736/m0.248  | 0.9782   | m0.649         | chr2     | AP004038      |
| Adenine DNA glycosylase         |       | MYH   | At4g12740   | Adenine DNA glycosylase like     | cp0.722/mt0.243 | 0.7144   | cp0.993        | chr12    | OJ1618_CO     |
| Thymine glycol DNA glycosylase  | NTG1  | NTH1  | At2g31450   | putative endonuclease            | cp0.553/mt0.252 | 0.5613   | m0.025         | unknown  |               |
|                                 |       |       | At1g05901   | endonuclease III like protein    | cp0.726/mt0.254 | 0.9828   |                | unknown  |               |
| 3-methyladenine DNA glycosylase | MAG   | MPG   | At1g75230   | putative 3-methyladenine DNA     | cp0.761/0.040   | 0.0030   | n              | chr1     | AC007858      |
|                                 |       |       | At1g19480   | Hypothetical protein             | cp0.853         | 0.0064   | n              | chr3     | AC120988      |
|                                 |       |       | At3g50880   | putative DNA-3-methyladenin      | cp0.843/0.079   | 0.1253   | n              |          |               |
| AP endonuclease                 | APN1  | APE1  | At2g41460   | DNA-lyase ARP                    | mt0.316         | 0.9899   | cp0.302        | chr1     | AP003221      |
| DNA polymerase                  | MIP1  | POLG  | At3g20540   | putative DNA polymerase "mdp"    | 0.741           | 0.8028   | 0.776          | chr8     |               |
|                                 |       |       | At1g50840   | Unknown protein "cdp"            | cp0.928/m0.314  | 0.9042   | cp0.957        |          |               |
| DNA ligase                      | CDC9  | LIG3  | At1g08130   | DNA ligase                       | cp0.737/m0.221  | 0.9943   | M0.520/cp0.790 | chr10    | AC090120      |
|                                 |       |       | At1g49250   | Hypothetical protein             | cp0.151/m0.165  | 0.2876   | n              | chr1     | AP003452      |
|                                 |       |       |             |                                  |                 |          |                | chr2     | AP004048      |
| DNA helicase                    | PIF1  |       | At3g51700*  | DNA helicase homolog PIF1        | cp0.253         | 0.0175   | cp0.188        | chr1     | AP003853      |
|                                 |       |       | At3g42100   | putative PIF1                    | n               | n        | n              | chr2     | AP004238      |

|                                                    |      |      |                                |                             |          |        |        |         |               |
|----------------------------------------------------|------|------|--------------------------------|-----------------------------|----------|--------|--------|---------|---------------|
|                                                    |      |      | At3g13250                      | Hypothetical protein        |          |        |        |         |               |
| SSB                                                | RIM1 | SSB  | At3g18580                      | Hypothetical protein        | 0.717    | 0.9948 | 0.544  | chr1    | AP003725      |
|                                                    |      |      | At4g11060                      | putative protein            | m0.521   | 0.8799 | 0.407  |         |               |
| Non-specific DNA binding prot                      | ABF2 | TFAM | At1g68150*                     | similar to ABF2             | m0.369   | 0.035  | m0.999 | chr2    | AP004058      |
|                                                    |      |      | At4g01720                      | similar to wild oat ABF2    | n        | n      | n      |         | AP004080      |
|                                                    |      |      | At3g51880                      | HMG2 like                   | m0.121   | 0.0851 | 0.716  | chr6    | AP007767      |
|                                                    |      |      |                                |                             |          |        |        | chr1    | AP002486      |
|                                                    |      |      |                                |                             |          |        |        |         | AP003492      |
|                                                    |      |      |                                |                             |          |        |        |         | AP003300      |
| Junction-specific endonuclease                     | CCE1 | n    | n                              |                             |          |        |        |         |               |
| Mismatch binding protein                           | MSH1 |      | At3g24320?                     | putative mismatch repair    |          |        |        | chr4    |               |
| 8-OxodGTPase                                       | mutT | MTH1 | At3g26690*                     | MutT-like protein           | 0.79     | 0.5745 | 0.151  | chr7    |               |
| dUTPase                                            |      | UTP1 | At3g46940                      | dUTP pyrophosphatase like   | cp0.305  | n      | p0.985 | unknown |               |
|                                                    |      |      | *several copies in A.t. genome |                             |          |        |        |         |               |
| Other loci possibly involved in mt DNA maintenance |      |      |                                |                             |          |        |        |         |               |
|                                                    | ILV5 |      | At3g58610                      | ketol acid reductoisomerase | cp0.980/ | 0.963  | 0.995  | chr1    | OSJNB60032K15 |
