# Supplementary material
Source: PubMed Central journal article supplement (PMC165405)
Supplement: plntcell_15_7_1619__2.pdf [file plntcell_15_7_1619__2.pdf]

**Appendix table 2a. Putative Arabidopsis homologues for rickettsial DNA metabolism**

| <b>Rickettsia gene</b> | <b>Putative A.t. homologue</b> | <b>Function</b>                          | <b>%Identity</b> | <b>Targeting</b> |
|------------------------|--------------------------------|------------------------------------------|------------------|------------------|
|                        | At1g50840                      | Unknown protein                          | 34%              |                  |
|                        |                                | Putative DNA repair and replication loci |                  | mt/cp            |
| GyrA                   | At3g10690                      | Putative GyraseA                         | 49%              | mt               |
| GyrB                   | At5g04130                      | Putative Gyrase B                        | 35%              | mt               |
|                        | At3g10270                      | Putative GyraseB                         | 39%              | mt               |
|                        | At5g04110                      | Putative Gyrase B                        | 39%              | -                |
| ruvB                   | At5g22330                      | Ruv DNA helicase like                    | 24%              | -                |
|                        | At5g67630                      | ruv B like                               |                  | -                |
|                        | At3g49830                      | ruv B -like                              |                  | -                |
| holB                   | At4g24790                      | DNA polymerase III like                  |                  | -                |
|                        | At2g02480                      | STICHEL                                  |                  | -                |
| recN                   | At2g27170                      | Putative chromatin associated protein    | 20%              | -                |
|                        | At5g07660                      |                                          |                  | -                |
|                        | At3g54670                      |                                          |                  | -                |
|                        | At1g65010                      |                                          |                  | -                |
| rnhB                   | At2g25100                      |                                          |                  |                  |
| uvrB                   | n.                             |                                          |                  | cp/mt            |
| xthA1                  | At2g41460                      | ARP                                      | 30%              | mt               |
|                        | At4g36050                      | Putative protein                         | 36%              | cp               |
|                        | At3g48425                      |                                          | 25%              |                  |
| xseB                   | n.                             |                                          |                  |                  |
| XerD                   | n.                             |                                          |                  |                  |
| RuvA                   | n.                             |                                          |                  |                  |
| DNA N                  | n.                             |                                          |                  |                  |
| DNA A                  | n.                             |                                          |                  |                  |
| recR                   | n.                             |                                          |                  | cp               |
| uvrD                   | At4g25120                      | putative protein                         |                  |                  |

|      |           |                            |     |       |
|------|-----------|----------------------------|-----|-------|
| recJ | n.        |                            |     | cp    |
| priA | At3g02060 | Helicase like protein      | 29% | -     |
|      | At5g41880 | DNA polymerase alpha       |     | cp    |
|      | At1g70070 |                            | 27% |       |
| DNAB | n.        |                            |     |       |
| recO | n.        |                            |     | -     |
| RecA | At2g19490 |                            | 56% | cp    |
|      | At1g79050 |                            | 52% | mt    |
|      | At3g10140 |                            | 41% | mt    |
|      | At3g32920 |                            | 52% | mt    |
| uvrC | n.        |                            |     | -     |
| RecF | At5g07660 | SMC like protein           | 23% | -     |
|      | At3g54670 | AtSMC1                     | 32% | mt    |
|      | At5g61460 | MIM                        | 28% | cp    |
| mfd  | At3g02060 |                            |     | cp    |
|      | At1g30680 |                            | 33% |       |
| xseA | n.        |                            |     |       |
| himA | n.        |                            |     | mt    |
| rnHA | At3g01410 | RnaseH                     |     | mt    |
|      | At5g51080 | RnaseH                     |     | -     |
|      | At1g24090 | RnaseH                     |     |       |
| dnaQ | At5g26940 | exonuclease                |     |       |
| addA | At4g25120 | Possibly, putative protein |     |       |
| dnaE | n.        |                            |     |       |
| xerC | n.        |                            |     |       |
| uvrA | n.        |                            |     | mt/cp |
| DNAG | At1g30680 |                            | 29% | -     |
|      | At1g30660 |                            |     |       |
| dnaX | At2g02450 | DNA polymIII like          | 34% |       |
|      | At1g14460 |                            | 33% |       |
|      | At4g24790 |                            | 33% |       |
|      | At5g45720 |                            | 29% | mt    |

|        |           |                                 |     |     |
|--------|-----------|---------------------------------|-----|-----|
|        | At4g18820 |                                 | 28% | -   |
| mutL   | At4g09190 | MLH1                            |     | -   |
|        | At4g02460 | PMS1                            |     | -   |
|        | At4g35520 |                                 |     | cp  |
| MutS   | At4g02070 |                                 | 38% | -   |
|        | At3g24495 | MSH7                            | 37% | -   |
|        | At3g18524 | MSH2                            | 31% | cp  |
|        | At4g25540 |                                 | 28% |     |
|        | At4g17380 |                                 | 37% | mt  |
|        | At3g24320 | MSH1                            | 27% | mt  |
| topA   | At4g31210 | DNA topoisomerase like          | 38% | mt  |
|        | At5g63920 | DNA topoisomerase III           | 23% | mt  |
|        | At2g32000 | DNA topoisomerase III putative  | 29% | -   |
| Mpg    | At3g12040 | DNA-3-Methyladenine glycosidase | 42% | -   |
| NthIII | At2g31450 | Endonuclease like               | 26% | -   |
|        | At1g14460 |                                 | 33% | -   |
|        | At3g10010 | DML2                            | 27% | -   |
| RadA   | At5g50340 | DNA repair protein like         | 42% | mt  |
| Ssb    | At4g11060 | Putative protein                | 23% | mt  |
|        | At3g18580 | Hypothetical protein            | 29% | cp  |
| RecG   | At3g02060 | Helicase like protein           | 33% | -   |
|        | At2g01440 | Putative RECG                   | 31% | mt  |
| polA   | At3g20540 | Putative DNA polymerase         | 36% | cp  |
|        | At4g32700 | Putative protein                | 25% | ?   |
|        | At1g34380 | DNA polymerase type I           | 27% | cp  |
|        | At3g52050 | Putative protein                | 24% | mt* |

n.) could not be identified, Localization: cp) chloroplast, mt) mitochondria, -) no targeting signal, ?) has a signal sequence, unknown targeting, \*) ambiguous targeting value
