# Supplementary material
Source: PubMed Central journal article supplement (PMC165405)
Supplement: plntcell_15_7_1619__3.pdf [file plntcell_15_7_1619__3.pdf]

| <b>Rickettsia RNA metabolism loci</b>         | <b>Putative Arabidopsis homologue</b> | <b>%ID</b> | <b>Target</b> |
|-----------------------------------------------|---------------------------------------|------------|---------------|
| RnhB ribonuclease HII                         | At2g25100                             | 34%        | -             |
| rpoB DNA-directed RNA polymerase Beta chain   | rpoB                                  | 41%        | in cp         |
|                                               | At4g21710                             | 40%        | -             |
|                                               | At3g18090                             | 35%        | -             |
|                                               | At3g23780                             | 33%        | mt            |
|                                               | At2g36990                             | 31%        | -             |
| rpoH RNA polymerase Sigma-32 factor           | At1g08540                             |            | cp            |
|                                               | At3g53920                             |            | cp            |
|                                               | At1g64860                             |            | cp            |
|                                               | At5g24120                             |            | mt            |
|                                               | At2g36990                             | 31%        | -             |
| rpoC DNA-directed RNA polymerase Beta chain   | rpoC1                                 | 51%        | in cp         |
|                                               | rpoC2                                 | 33%        | in cp         |
|                                               | At4g35800                             | 28%        | -             |
|                                               | At3g57660                             | 36%        | -             |
|                                               | At5g60040                             | 32%        | -             |
|                                               | At2g40030                             | 21%        | -             |
|                                               | At3g48830                             | 30%        | -             |
|                                               | At1g28090                             | 28%        | -             |
| pcnB poly(A) polymerase                       | At5g23690                             | 28%        | m             |
|                                               | At1g22660                             | 30%        | cp/mt         |
|                                               | At2g17580                             | 41%        | -             |
|                                               | n.                                    |            |               |
|                                               | At3g03710                             | 44%        | -             |
| Pnp polyribonucleotide nucleotidyltransferase | At5g14580                             | 38%        | mt            |
|                                               | At3g03300                             | 41%        | -             |
| rrn ribonuclease III                          | At5g20320                             | 40%        | -             |
|                                               | At1g01040                             | 39%        | -             |

|                                                                                                                                                                                 |                         |     |       |
|---------------------------------------------------------------------------------------------------------------------------------------------------------------------------------|-------------------------|-----|-------|
| nusBN utilization substance protein B                                                                                                                                           | n.                      |     |       |
| NusG transcription antitermination protein nusg                                                                                                                                 | At3g09210 unknown       | 32% | mt    |
| Rnd ribonuclease D                                                                                                                                                              | n.                      |     |       |
| rho transcription termination factor                                                                                                                                            | n.                      |     |       |
| rne ribonuclease E                                                                                                                                                              | At2g04270               | 32% | -     |
|                                                                                                                                                                                 | At3g02930               | 22% | cp/m* |
| nusA N utilization substance protein A                                                                                                                                          | n.                      |     |       |
| rpoA DNA-directed RNA polymerase alpha chain                                                                                                                                    | rpoA                    | 31% | in Cp |
| rnhA ribonuclease H                                                                                                                                                             | At3g01410               | 31% | mt*   |
|                                                                                                                                                                                 | At5g51080               |     | mt    |
| greA transcription elongation factor greA                                                                                                                                       | n.                      |     |       |
| rph ribonuclease PH                                                                                                                                                             | At3g61620 RRP4          | 26% | -     |
| rpoD RNA polymerase Sigma factor                                                                                                                                                | At2g36990               | 38% | -     |
|                                                                                                                                                                                 | At1g08540 (SIG1)        | 39% | cp    |
|                                                                                                                                                                                 | At5g13730               | 35% | cp    |
|                                                                                                                                                                                 | At3g53920 SIGC          | 30% | cp    |
| rhIE putative ATP-dependent RNA helicase                                                                                                                                        | At5g63120               | 39% | -     |
|                                                                                                                                                                                 | At3g22310               | 40% | mt    |
|                                                                                                                                                                                 | At1g55150               | 42% | -     |
|                                                                                                                                                                                 | At3g01540 DRH1          | 43% | -     |
|                                                                                                                                                                                 | At3g22330               | 37% | mt    |
|                                                                                                                                                                                 | +48 other RNA helicases |     |       |
| n.) could not be identified, Localization: cp) chloroplast, mt) mitochondria, -) no targeting signal, ?) has a signal sequence, unknown targeting, *) ambiguous targeting value |                         |     |       |
